# Supplementary material for: Anchoring defective metal-free catalysts on montmorillonite nanosheets for tetracycline removal: synergetic adsorption-catalysis and mechanism insights
Source: Royal Society of Chemistry journal article supplement (doi:10.1039/d3va00331k), 2023-12-22
Supplement: d3va00331k1.pdf [file d3va00331k1.pdf]

## Supporting Information

# **Anchoring defective metal-free catalysts on montmorillonite nanosheets for tetracycline removal: synergetic adsorption- catalysis and mechanism insight**

Min Li<sup>a</sup>, Xudong Liu<sup>a,b</sup>, Zhinan Xie<sup>a</sup>, Chunfang Du<sup>a\*</sup>, Yiguo Su<sup>a\*</sup>

*Inner Mongolia Key Laboratory of Chemistry and Physics of Rare Earth Materials, School of Chemistry and*

*Chemical Engineering, Inner Mongolia University, Hohhot, Inner Mongolia 010021, PR China*

*Department of Chemistry, Baotou Teachers' College, Baotou, Inner Mongolia 014030, PR China*

*Corresponding author E-mail: cesyg@imu.edu.cn; cedchf@imu.edu.cn; Fax: +86-471-4994375; Tel: +86-471-*

*4994375*

**Table S1.** Elemental analysis results for C<sub>3</sub>N<sub>5</sub> and 10CN-MMT.

| Elemental analysis result     |       |       |       |
|-------------------------------|-------|-------|-------|
| Sample                        | N%    | C%    | H%    |
| C <sub>3</sub> N <sub>5</sub> | 59.8  | 36.5  | 1.77  |
| 10CN-MMT                      | 0.427 | 0.497 | 0.833 |

**Table S2.** Kinetic parameters of various models.

| Kinetic Models      | Parameters                                   | C <sub>3</sub> N <sub>5</sub> | MMT Ns  | 10CN-MMT |
|---------------------|----------------------------------------------|-------------------------------|---------|----------|
| Pseudo-first-order  | $q_e$ (mg·g <sup>-1</sup> )                  | 5.69                          | 14.3    | 38.0     |
|                     | $k_1$ (min <sup>-1</sup> )                   | 0.0291                        | 0.0781  | 0.0870   |
|                     | $R^2$                                        | 0.930                         | 0.903   | 0.971    |
| Pseudo-second-order | $q_e$ (mg·g <sup>-1</sup> )                  | 7.93                          | 16.9    | 44.8     |
|                     | $k_2$ (mg·g <sup>-1</sup> ·h <sup>-1</sup> ) | 0.00201                       | 0.00601 | 0.00201  |
|                     | $R^2$                                        | 0.940                         | 0.935   | 0.988    |
| Webber-Morris       | $C$ (mg·g <sup>-1</sup> )                    | -0.0750                       | 1.34    | 4.12     |
|                     | $k_{id}$                                     | 0.609                         | 1.89    | 5.03     |
|                     | $R^2$                                        | 0.954                         | 0.927   | 0.936    |
| Elovich             | $\alpha$                                     | 0.226                         | 3.68    | 12.1     |
|                     | $\beta$                                      | 0.399                         | 0.281   | 0.111    |
|                     | $R^2$                                        | 0.948                         | 0.955   | 0.995    |

**Table S3.** Isothermal model parameters of TC adsorption over 10CN-MMT.

| Models                    | Parameters                            |                                       |       |                |
|---------------------------|---------------------------------------|---------------------------------------|-------|----------------|
| Freundlich model          | $1 \cdot n^{-1}$                      | $k_F (\text{L} \cdot \text{mg}^{-1})$ | $R^2$ | Standard error |
|                           | 2.96                                  | 11.8                                  | 0.897 | 2.58           |
| Langmuir model            | $q_m (\text{mg} \cdot \text{g}^{-1})$ | $k_L (\text{L} \cdot \text{mg}^{-1})$ | $R^2$ | Standard error |
|                           | 45.9                                  | 0.143                                 | 0.997 | 0.01           |
| Redlich-Peterson<br>model | $\alpha$                              | $K_p (\text{L} \cdot \text{mg}^{-1})$ | $R^2$ | Standard error |
|                           | 0.143                                 | 6.56                                  | 0.997 | 0.320          |
| Temkin model              | A                                     | $K_T (\text{L} \cdot \text{mg}^{-1})$ | $R^2$ | Standard error |
|                           | 10.0                                  | 1.39                                  | 0.972 | 0.980          |

**Table S4.** The comparison on the catalytic activity of 10CN/MMT activated PMS for pollutant degradation with metal-free catalysts reported in the literature.

| <b>Sample</b>            | <b>Type of pollutant</b> | <b>C<sub>pol</sub> (mg·L<sup>-1</sup>)</b> | <b>Reaction time (min)</b> | <b>Degradation efficiency (%)</b> | <b>TOC (%)</b> | <b>Ref.</b> |
|--------------------------|--------------------------|--------------------------------------------|----------------------------|-----------------------------------|----------------|-------------|
| <b>10CN-MMT</b>          | TC                       | 50                                         | 120                        | 95.0                              | 81.1           | this work   |
| <b>NBC<sub>2,0</sub></b> | SMX                      | 30                                         | 5                          | 99.8                              | 81.7           | [1]         |
| <b>N-CPANI</b>           | DOX                      | 20                                         | 120                        | 91.7                              | 83.8           | [2]         |
| <b>BNC</b>               | Phenol                   | 30                                         | 100                        | 99.6                              | 68.3           | [3]         |
| <b>BC-300</b>            | Phenol                   | 10                                         | 98.3                       | 98.0                              | 46.0           | [4]         |
| <b>PWC</b>               | BG                       | 10                                         | 120                        | 95.0                              | 61.0           | [5]         |
| <b>FAC</b>               | PFOA                     | 4                                          | 360                        | 93.5                              | 84.5           | [6]         |
| <b>1NSDMC-30</b>         | 4-CP                     | 80                                         | 60                         | 100                               | 74.1           | [7]         |
| <b>PDA-gCN-1.0</b>       | SMX                      | 10                                         | 5                          | 100                               | 56.1           | [8]         |
| <b>CN-CGs</b>            | BPA                      | 50                                         | 30                         | 90.0                              | 80.0           | [9]         |
| <b>SBC</b>               | TCS                      | 9.8                                        | 240                        | 98.9                              | 32.5           | [10]        |

**Table S5.** Possible intermediates of TC degradation.

| No. | Molecular weight (m/z) | Tentative structure                                                                  | Detected |
|-----|------------------------|--------------------------------------------------------------------------------------|----------|
| —   | 445                    | 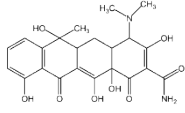   | √        |
| P1  | 428                    |    | √        |
| P2  | 362                    |    | √        |
| P3  | 318                    |    | √        |
| P4  | 415                    |   | √        |
| P5  | 400                    |  | √        |
| P6  | 318                    |  | √        |
| P7  | 274                    |  | √        |
| P8  | 460                    |  | √        |
| P9  | 218                    |  | √        |
| P10 | 174                    |  | √        |

---

|            |     |                                                                                                                |   |
|------------|-----|----------------------------------------------------------------------------------------------------------------|---|
| <b>P11</b> | 122 | 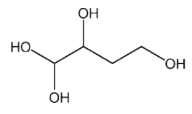<br><chem>OCC(O)CO</chem>    | √ |
| <b>P12</b> | 100 | <br><chem>CC(=O)C(O)C</chem> | √ |
| <b>P13</b> | 83  | <br><chem>O=CC=CC=O</chem>   | √ |
| <b>P14</b> | 61  | <br><chem>NC(=O)O</chem>     | √ |
| <b>P15</b> | 130 | <br><chem>C=CC(O)C=C</chem>  | √ |

---

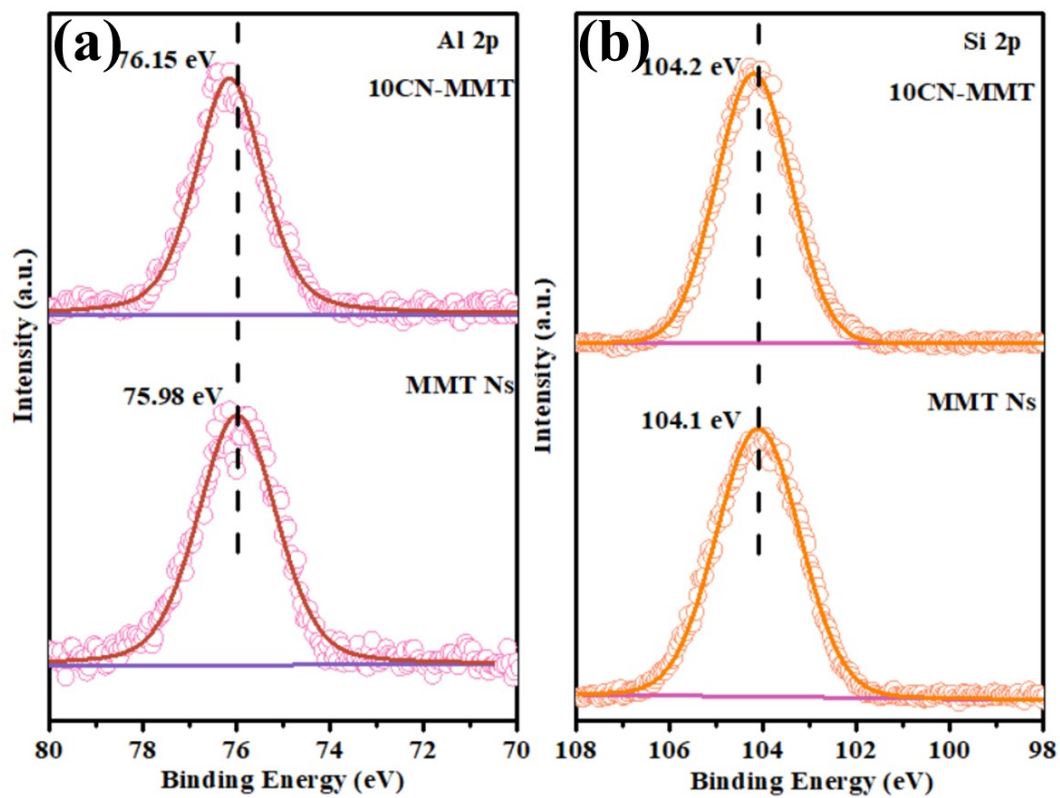

Fig. S1. XPS spectra of Al 2p (a) and Si 2p (b) for MMT Ns and 10CN-MMT.

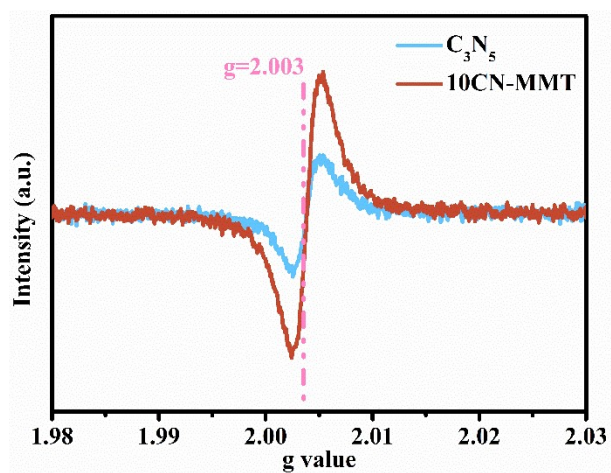

Fig. S2. ESR spectra of  $C_3N_5$  and 10CN-MMT samples at room temperature.

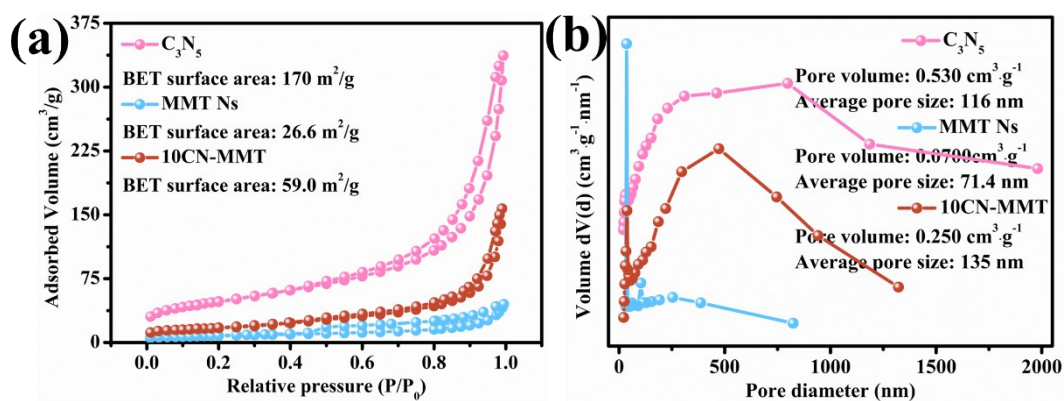

**Fig. S3.** N<sub>2</sub> adsorption-desorption isotherms (a) and pore size distribution curves (b) of C<sub>3</sub>N<sub>5</sub>, MMT Ns and 10CN-MMT.

Fig. S3a showed the N<sub>2</sub> adsorption-desorption curves of C<sub>3</sub>N<sub>5</sub>, MMT Ns, and 10CN-MMT. The N<sub>2</sub> adsorption occurred in the range of relative pressure from 0.5 to 1.0, which indicated that type IV isotherms existed in C<sub>3</sub>N<sub>5</sub>, MMT Ns, and 10CN-MMT<sup>11,12</sup>. The specific surface area of C<sub>3</sub>N<sub>5</sub> could reach 170 m<sup>2</sup>·g<sup>-1</sup> with pore volume of 0.530 cm<sup>3</sup>·g<sup>-1</sup> as shown in Fig. S3b. The specific surface area of MMT Ns was small (26.6 m<sup>2</sup>·g<sup>-1</sup>) and concentrated in the range of 2–10 nm, which belonged to the mesoporous structure. 10CN-MMT sample with BET surface area of 58.95 m<sup>2</sup>·g<sup>-1</sup> was higher than that of pristine MMT Ns. As shown in the TEM image in Fig. 4c, C<sub>3</sub>N<sub>5</sub> was highly dispersed on the MMT Ns, and the average pore size (135 nm) of 10CN-MMT was significantly increased compared with MMT Ns and C<sub>3</sub>N<sub>5</sub>, and the larger and open pore channels were favorable for the adsorption and desorption of PMS and TC molecules.



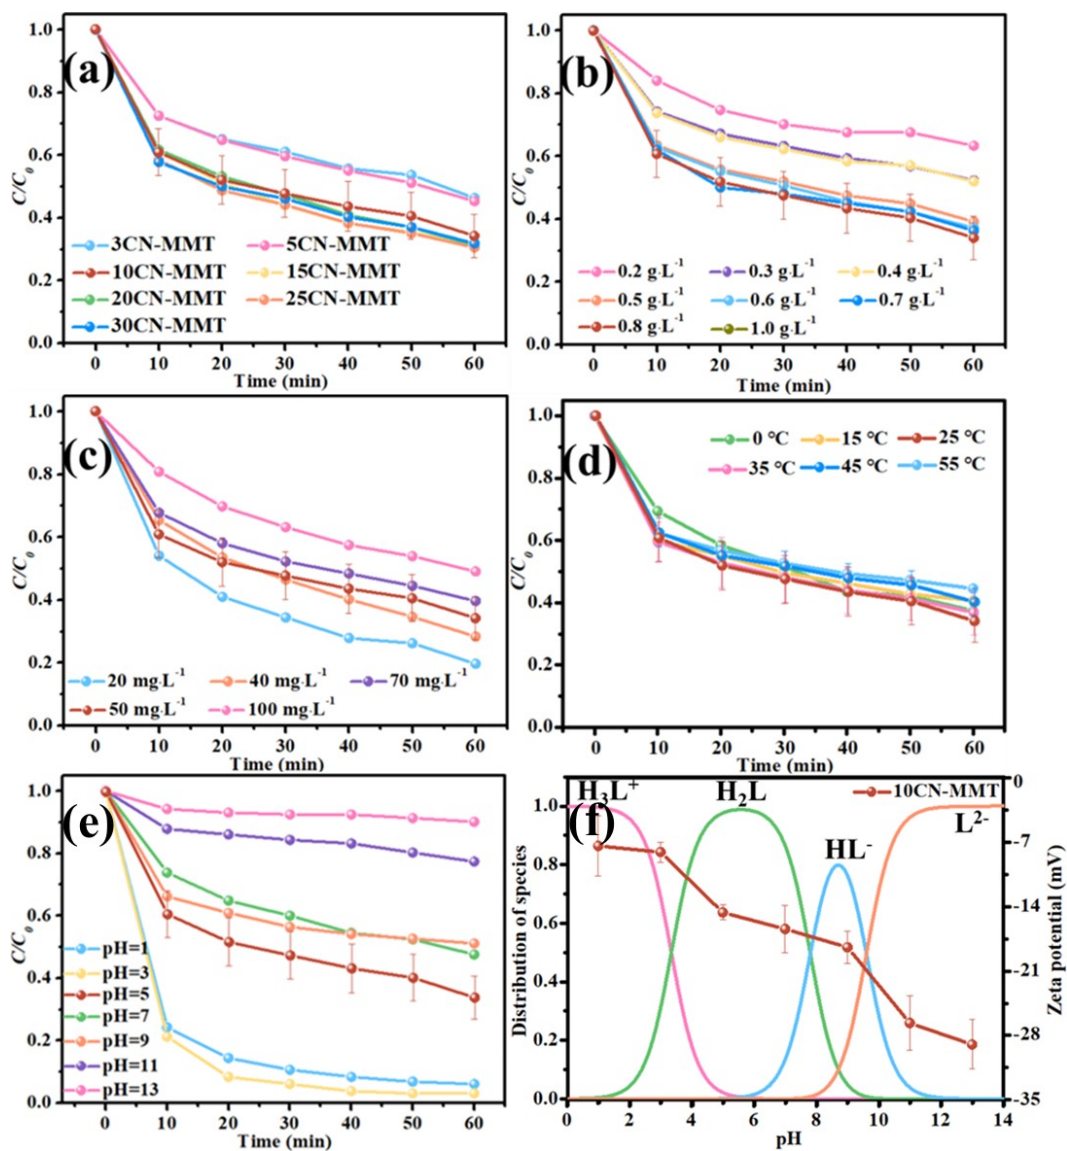

**Fig. S4.** Effects of CN loading amount (a), catalyst dosage (b), initial TC concentration (c), temperature (d), and pH value (e) on the TC adsorption efficiency. Chemical structure of TC and Zeta potential of 10CN-MMT under different pH values (f). General experiment parameters: [TC] = 50 mg · L<sup>-1</sup>; [10CN-MMT] = 0.8 g · L<sup>-1</sup>; initial pH = 5.0; T = 25 °C.

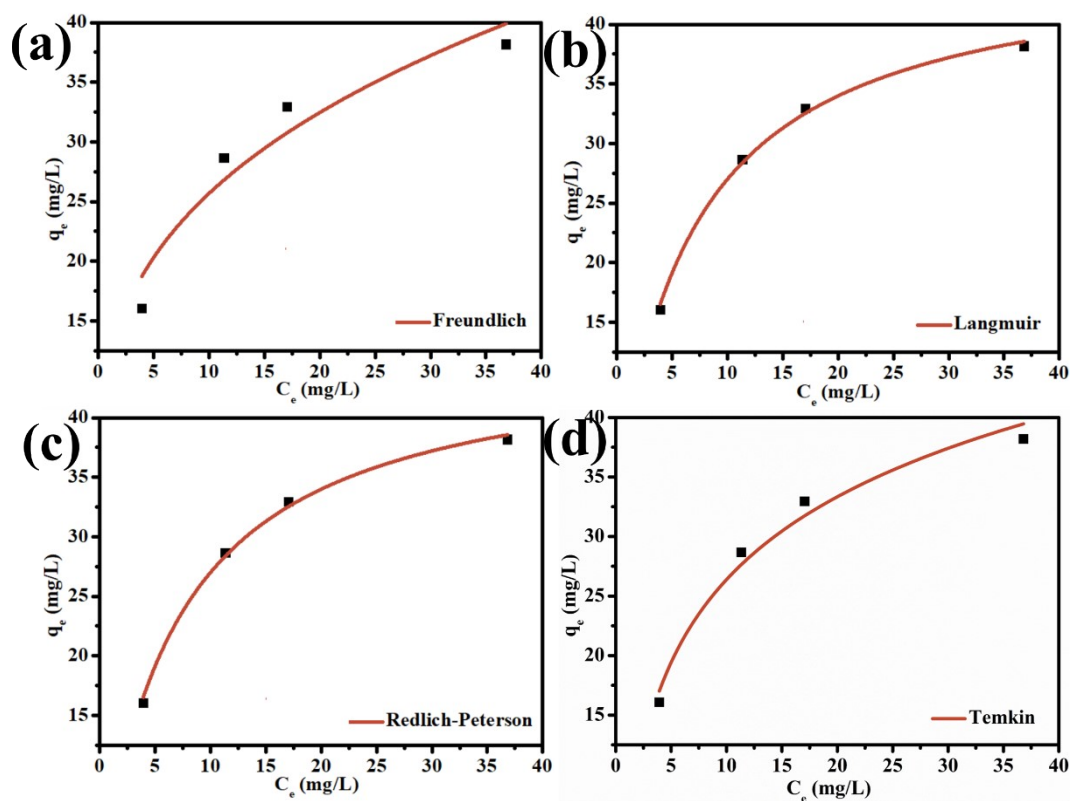

**Fig. S5.** Freundlich (a), Langmuir (b), Redlich-Peterson (c), and Temkin (d) isothermal models for 10CN-MMT toward TC.

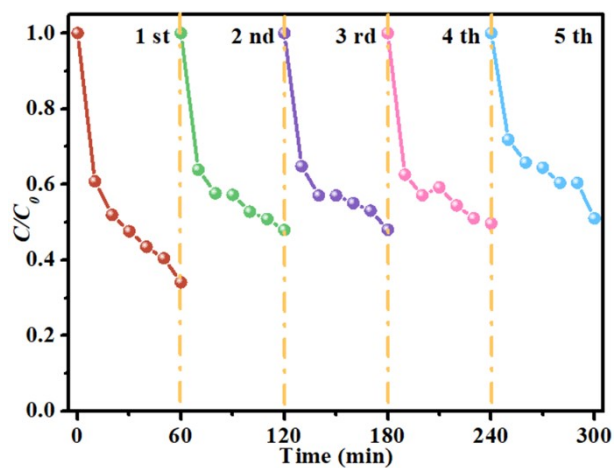

**Fig. S6.** The cycle performance of TC adsorption over 10CN-MMT.

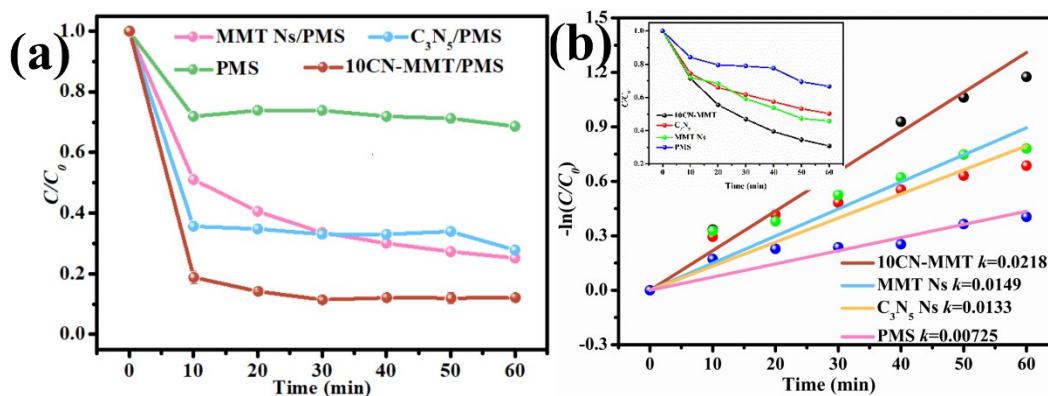

**Fig. S7.** The degradation performance of various samples toward TC(a). General experiment parameters:  $[TC] = 50 \text{ mg} \cdot \text{L}^{-1}$ ;  $[\text{catalyst}] = 0.8 \text{ g} \cdot \text{L}^{-1}$ ;  $[\text{PMS}] = 0.3 \text{ mmol} \cdot \text{L}^{-1}$ ; initial pH = 5.0;  $T = 25 \text{ }^\circ\text{C}$ . The pseudo first-order kinetic models for various samples toward TC within 60 min (b). General experiment parameters:  $[TC] = 50 \text{ mg} \cdot \text{L}^{-1}$ ;  $[\text{catalyst}] = 0.4 \text{ g} \cdot \text{L}^{-1}$ ;  $[\text{PMS}] = 0.3 \text{ mmol} \cdot \text{L}^{-1}$ ; initial pH = 5.0;  $T = 25 \text{ }^\circ\text{C}$ .

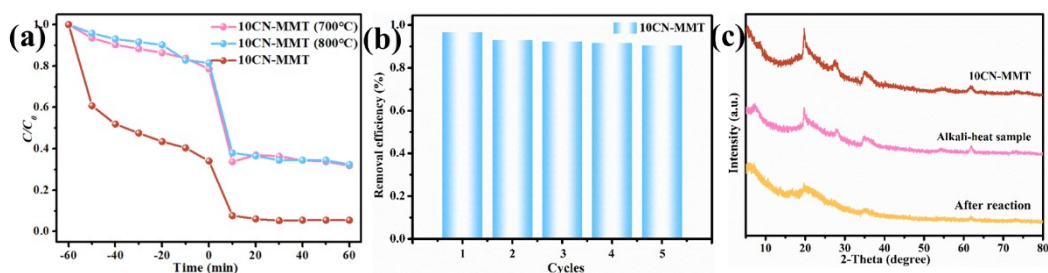

**Fig. S8.** TC degradation efficiency over 10CN-MMT, 10CN-MMT (700 °C), and 10CN-MMT (800 °C) (a). Recycle tests of TC degradation over 10CN-MMT (b). XRD patterns of 10CN-MMT, alkali-heat sample and the sample after catalytic reaction (c). General experiment parameters:  $[TC] = 50 \text{ mg} \cdot \text{L}^{-1}$ ;  $[10\text{CN-MMT}] = 0.8 \text{ g} \cdot \text{L}^{-1}$ ;  $[\text{PMS}] = 0.3 \text{ mmol} \cdot \text{L}^{-1}$ ; initial pH = 5.0;  $T = 25 \text{ }^\circ\text{C}$ .

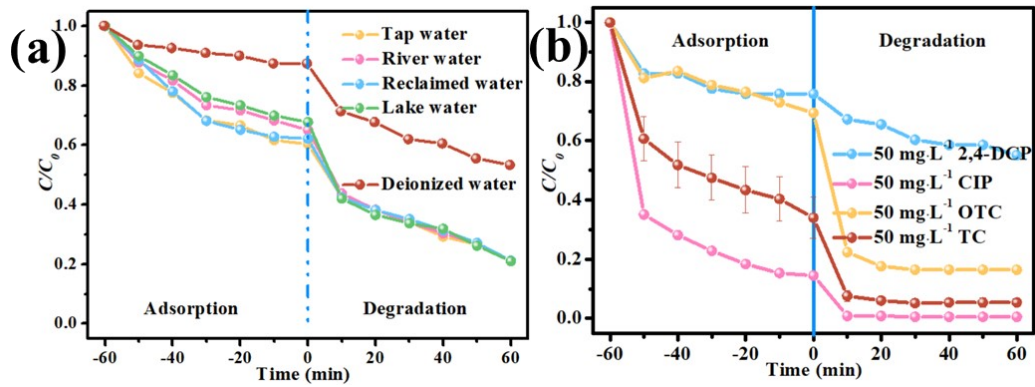

**Fig. S9.** Degradation efficiencies of TC in different water environments (a). General experiment parameters: [TC] = 50 mg·L<sup>-1</sup>; [10CN-MMT] = 0.1 g·L<sup>-1</sup>; [PMS]= 0.3 mmol·L<sup>-1</sup>; T = 25 °C. The catalytic efficiency of 10CN-MMT toward various organic pollutants (b). General experiment parameters: [TC] = 50 mg·L<sup>-1</sup>; [10CN-MMT] = 0.8 g·L<sup>-1</sup>; [PMS] = 0.3 mmol·L<sup>-1</sup>; T = 25 °C.

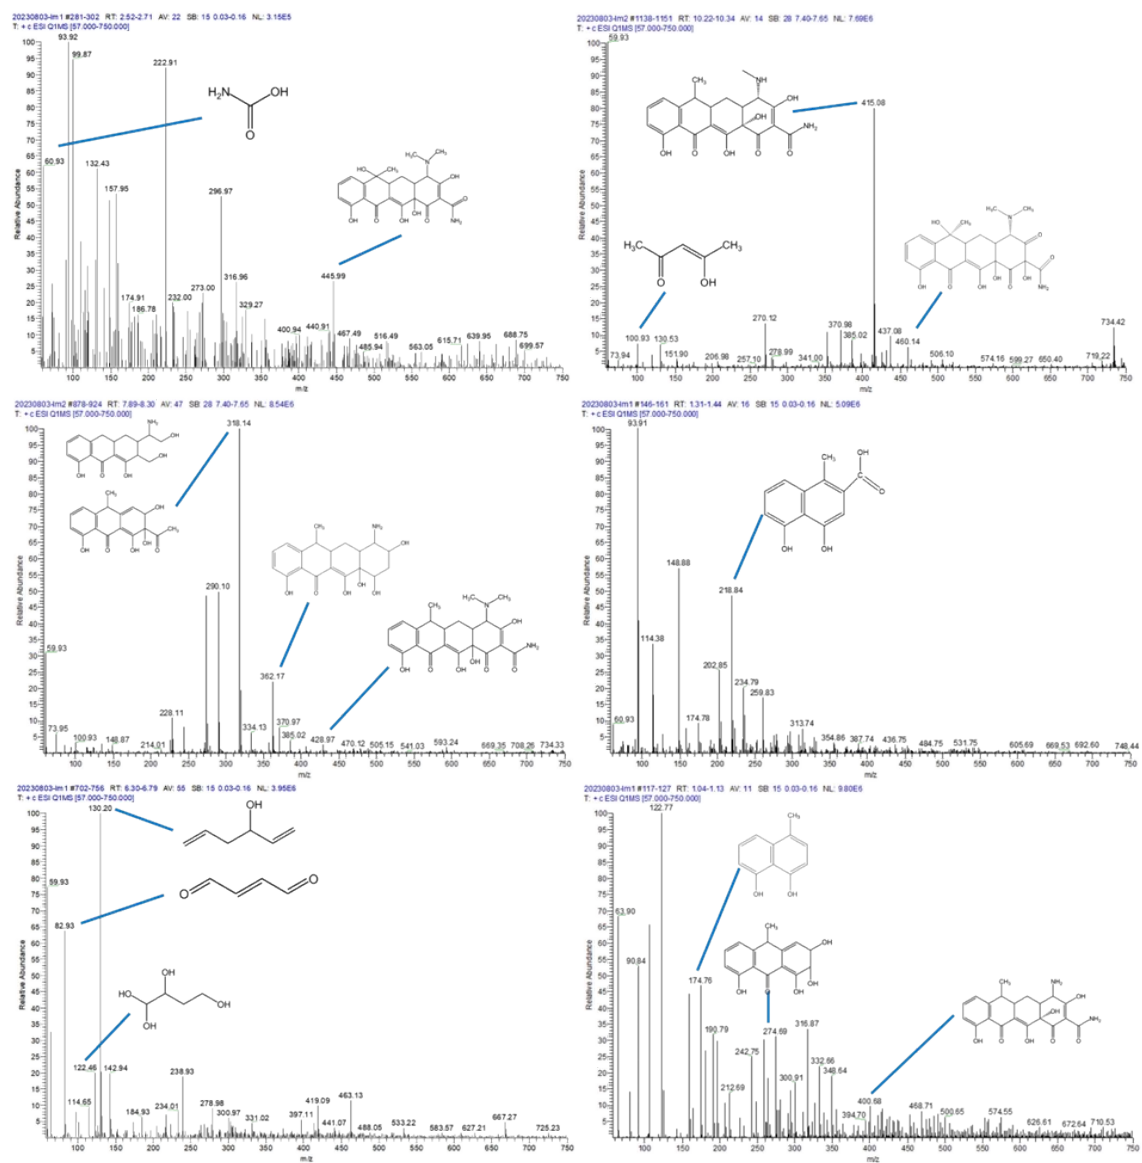

**Fig. S10.** LC-MS analysis of 10CN-MMT/PMS/TC in 15 and 60 min.

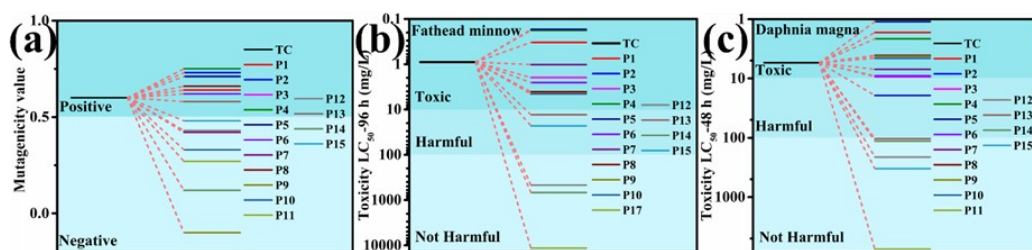

**Fig. S11.** Mutagenicity value (a), acute toxicity  $LC_{50}$  of fathead minnow (b), and acute toxicity  $LC_{50}$  of daphnia magna (c) of TC and its intermediate products.

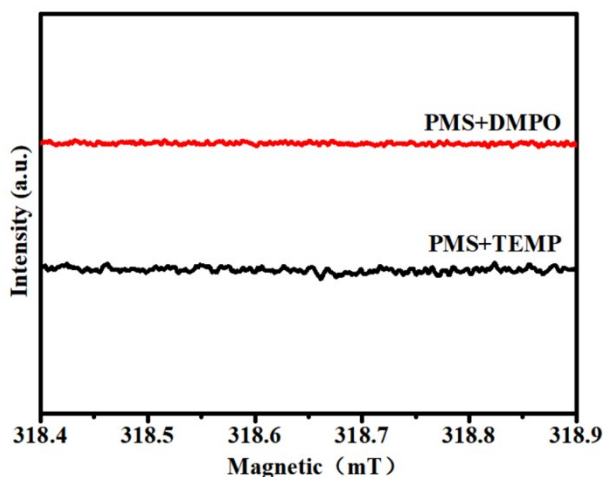

**Fig. S12.** ESR spectra of pure PMS in aqueous solution.

## References

- 1 Y. Zhang, T. Wang, X. Zhang, Y. Sun, G. Fan, G. Song, and B. Chai, *Appl. Surf. Sci.*, 2024, **647**, 158965.
- 2 M. Cheng, R. Ma, G. Chai, Y. Chen, L. Bai, D. Wang, J. Qian, and G. Chen, *Chem. Eng. J.*, 2023, **453**, 39810.
- 3 X. Li, Z. Ye, S. Xie, H. Li, Y. Lv, Y. Wang, Y. Wang, and C. Lin, *J. Environ. Chem. Eng.*, 2022, **10**, 108264.
- 4 X. Liu, J. Zhou, and D. Liu, *J. Environ. Chem. Eng.*, 2022, **10**, 107833.
- 5 S. Kumar, C. Tewari, N. G. Sahoo, and L. Philip, *J. Hazard. Mater.* 2022, **435**, 128956.
- 6 G. Liu, C. Li, B. A. Stewart, L. Liu, M. Zhang, M. Yang, and K. Lin, *Chem. Eng. J.*, 2020, **399**, 125722.
- 7 J. Yang, X. He, J. Dai, Y. Chen, Y. Li, and X. Hu, *Environ. Res.* 2021, **194**, 110496.
- 8 S. Cai, X. Zuo, H. Zhao, S. Yang, R. Chen, L. Chen, R. Zhang, D. Ding, and T. Cai,

J. Mater. Chem. A, 2022, **10**, 9171.

9 X. Zhang, R. Zhao, N. Zhang, Y. Su, Z. Liu, R. Gao, C. Du, Appl. Catal. B, 2020, **263**, 118316.

10 S. Wang, and J. Wang, Chem. Eng. J., 2019, **356**, 350-358.

11 C. Rao, L. Zhou, Y. Pan, C. Lu, X. Qin, H. Sakiyama, M. Muddassir, and J. Liu, J. Alloys Compd., 2022, **897**, 163178.

12 X. Zhang, M. Li, Y. Su, and C. Du, Appl Clay Sci, 2021, **211**, 106208.
